# Supplementary material for: D–A conjugated polymers based on thieno[3,2-b]indole (TI) and 2,1,3-benzodiathiazole (BT) derivatives: synthesis, characterization and side-chain influence on photovoltaic properties
Source: Royal Society of Chemistry journal article supplement (doi:10.1039/c6ra05413g), 2016-01-01
Supplement: c6ra05413g1.pdf [file c6ra05413g1.pdf]

# Supporting Information

## **D–A Conjugated Polymers Based on Thieno[3,2-b]indole (TI) and 2,1,3-benzodithiazole (BT) Derivatives: Synthesis, Characterization and Side-Chain Influence on Photovoltaic Properties**

**Hongyan Huang<sup>a</sup>, Quan Li<sup>a</sup>, Meng Qiu<sup>b</sup>, Zheng Wang<sup>a</sup>, Xinzhen Zhang<sup>a</sup>, Shuli Liu<sup>a</sup>, Nina Fu<sup>a</sup>, Renqiang Yang<sup>b,\*</sup>, Baomin Zhao<sup>a,\*</sup>, Wei Huang<sup>a,c\*</sup>**

<sup>a</sup> Key Laboratory for Organic Electronics and Information Displays & Institute of Advanced Materials (IAM), Jiangsu National Synergetic Innovation Center for Advanced Materials (SICAM), Nanjing University of Posts & Telecommunications, 9 Wenyuan Road, Nanjing 210023, China.

<sup>b</sup> CAS Key Laboratory of Bio-based Materials, Qingdao Institute of Bioenergy and Bioprocess Technology, Chinese Academy of Sciences, Qingdao 266101, China.

<sup>c</sup> Key Laboratory of Flexible Electronics (KLOFE) & Institute of Advanced Materials (IAM), Jiangsu National Synergetic Innovation Center for Advanced Materials (SICAM), Nanjing Tech University (Nanjing Tech), 30 South Puzhu Road, Nanjing 211816, China.

## Table of Contents

|                                  |                        |
|----------------------------------|------------------------|
| <b>TGA Plot</b> .....            | Fig S1                 |
| <b>SCLC Mobility</b> .....       | Fig S2 and Table<br>S1 |
| <b>Device Optimization</b> ..... | Fig S3-S5              |
| <b>NMR Spectra</b> .....         | Fig S6-S16             |

## Section 1. TGA plot.

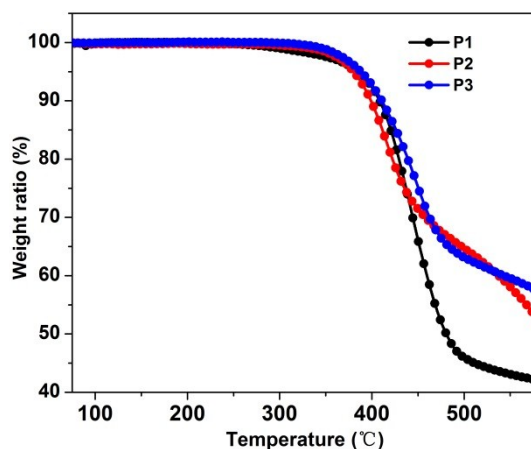

**Fig S1.** TGA plots of **P1**, **P2** and **P3** at a heating rate of  $10\text{ }^{\circ}\text{C min}^{-1}$  under nitrogen atmosphere.

## Section 2. SCLC Mobility plot.

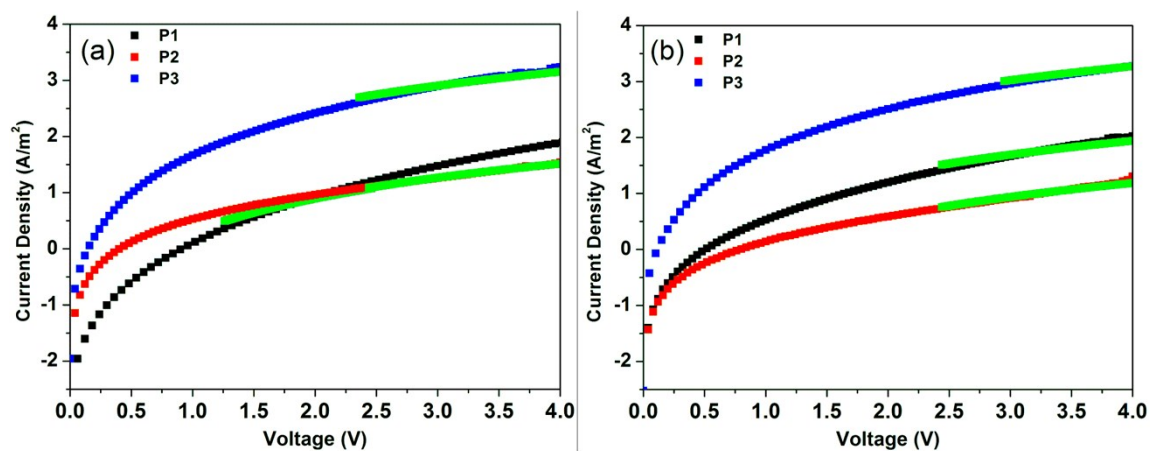

**Fig S2.** Current density ( $J$ )–voltage ( $V$ ) profiles of Polymer/ $\text{PC}_{71}\text{BM}$  based devices with a weight ratio of (a) 1:3 and (b) 1:4 for the measurement of the hole mobilities under the optimized conditions. (symbols are experimental data for transport of hole, and the green line were fitted according to the space-charge-limited-current model).

**Table S1.** Charge transport properties for the Polymer: $\text{PC}_{71}\text{BM}$  blend estimated by the SCLC model.

| Blend                         | D/A ratio<br>(w/w) | Mobility<br>$\text{cm}^2\text{ V}^{-1}\text{ s}^{-1}$ |
|-------------------------------|--------------------|-------------------------------------------------------|
| P1: $\text{PC}_{71}\text{BM}$ | 1:3                | $4.76 \times 10^{-7}$                                 |
|                               | 1:4                | $1.31 \times 10^{-6}$                                 |

|                        |     |                       |
|------------------------|-----|-----------------------|
| P2:PC <sub>71</sub> BM | 1:3 | $4.98 \times 10^{-7}$ |
|                        | 1:4 | $2.38 \times 10^{-7}$ |
| P3:PC <sub>71</sub> BM | 1:3 | $2.17 \times 10^{-5}$ |
|                        | 1:4 | $2.84 \times 10^{-5}$ |

### Section 3. Device optimization.

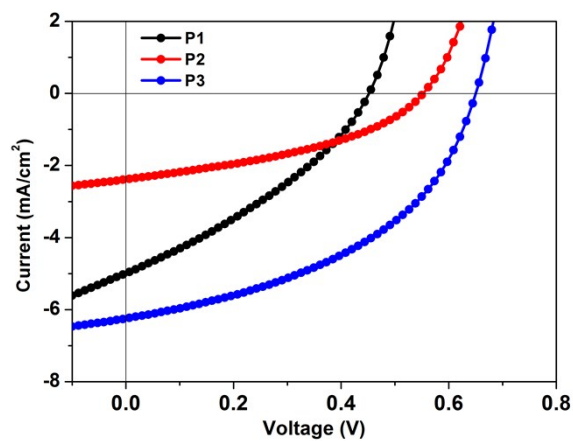

**Fig S3.**  $J$ - $V$  characteristics of Polymers:PC<sub>71</sub>BM (1:4) with cosolvents of DCB:CF (9:1,  $v/v$ ) under thermal annealing 150 °C.

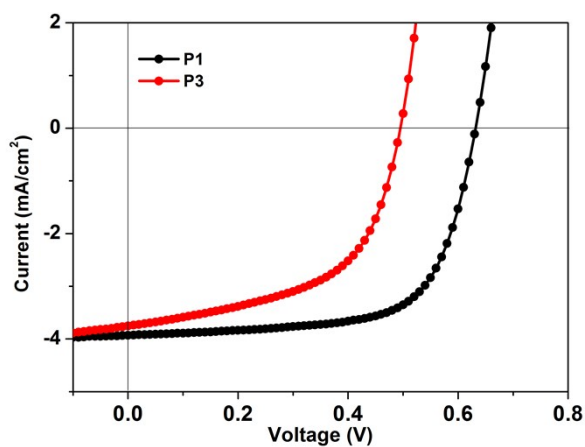

**Fig S4.**  $J$ - $V$  characteristics of P1:PCBM (1:3), P2:PCBM (1:4) with additive (DIO) as additive under thermal annealing at 150 °C.

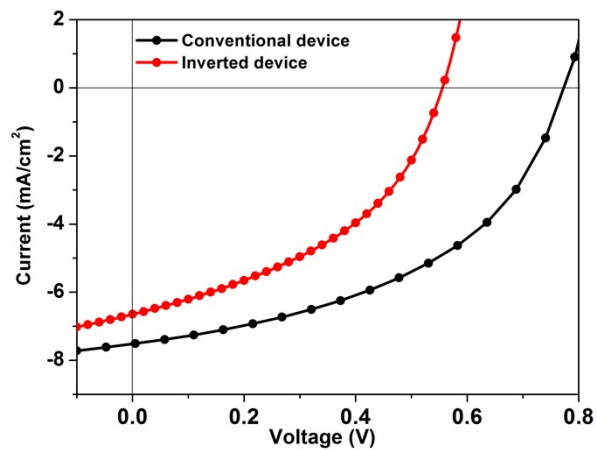

Fig S5.  $J$ - $V$  characteristics of P3:PC<sub>71</sub>BM (1:4) with inverted configuration.

## Section 4. NMR spectra.

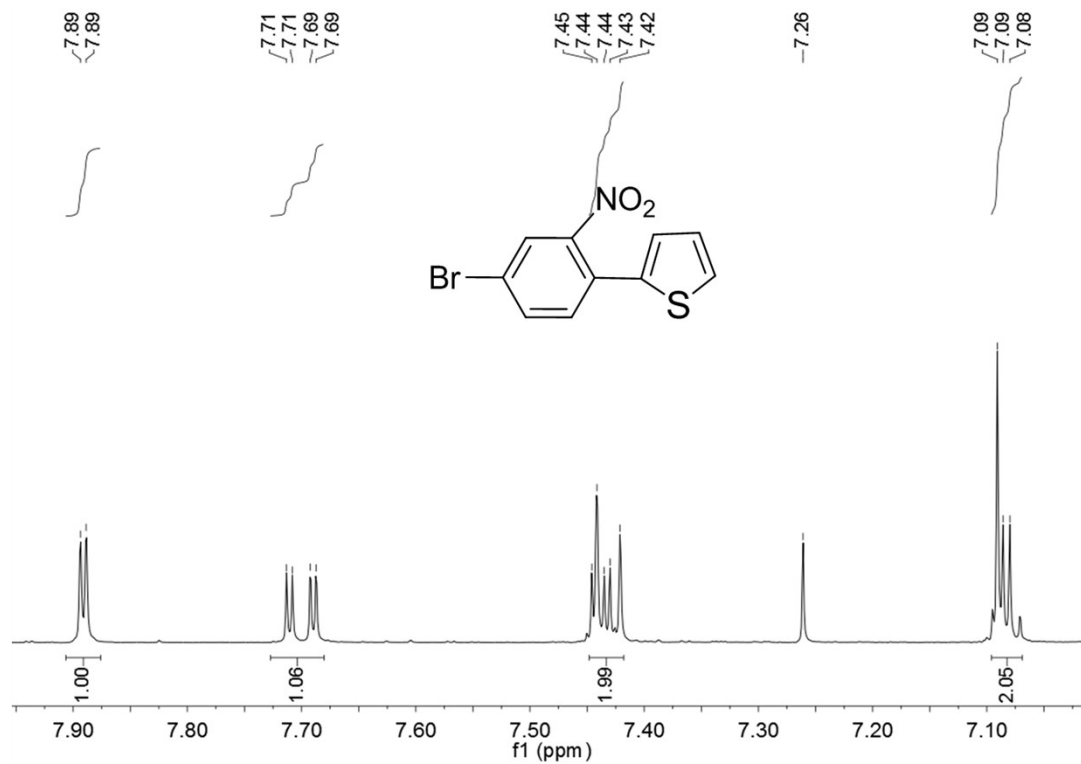

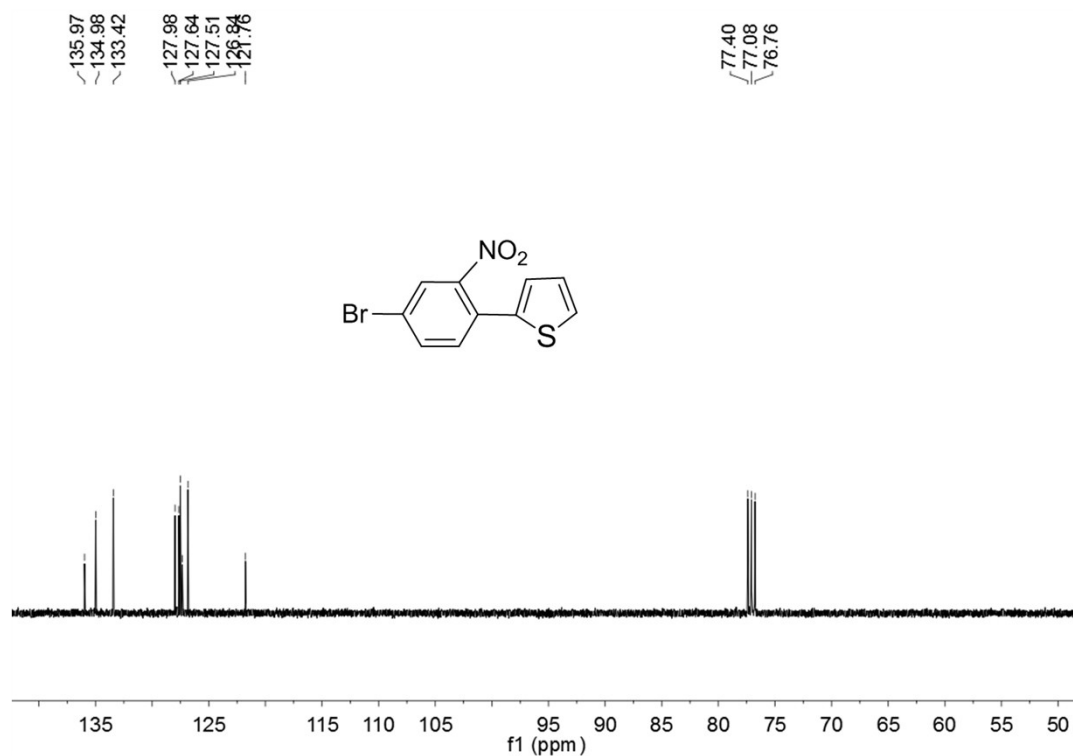

**Fig S6.** <sup>1</sup>H and <sup>13</sup>C NMR spectra of 2-(4-bromo-2-nitrophenyl)thiophene (2) in CDCl<sub>3</sub>

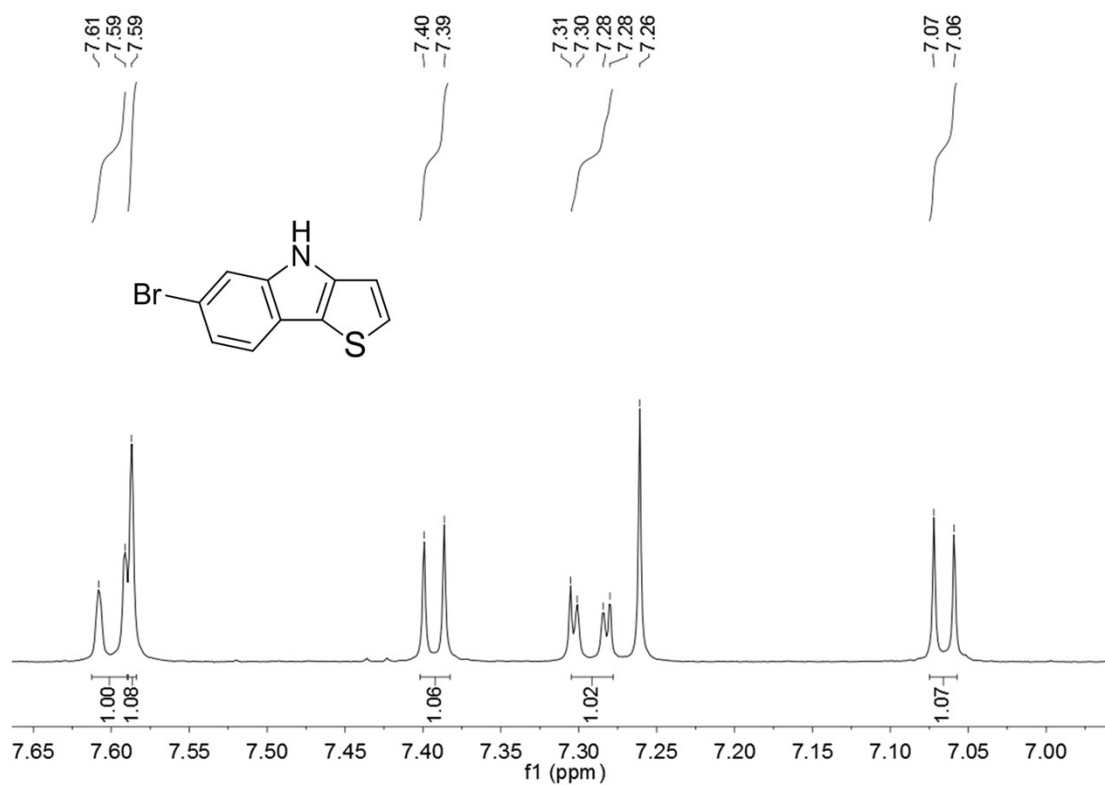

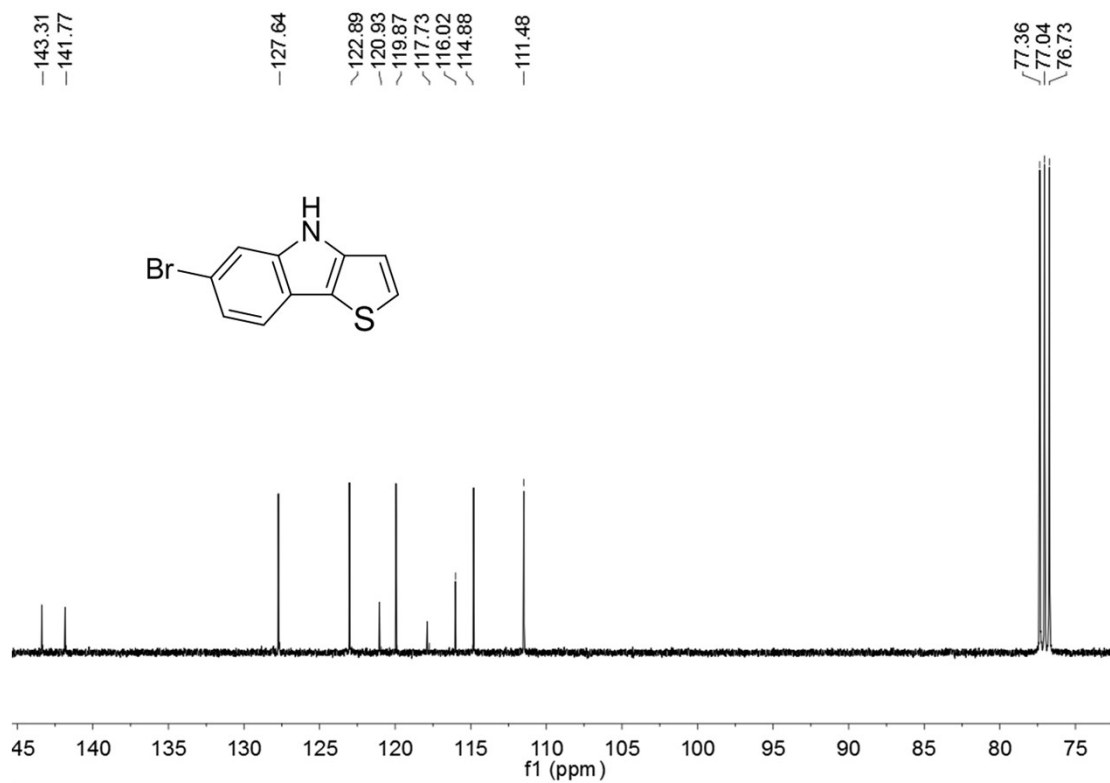

**Fig S7.**  $^1\text{H}$  and  $^{13}\text{C}$  NMR spectra of 6-bromo-4H-thieno[3,2-b]indole (3) in  $\text{CDCl}_3$

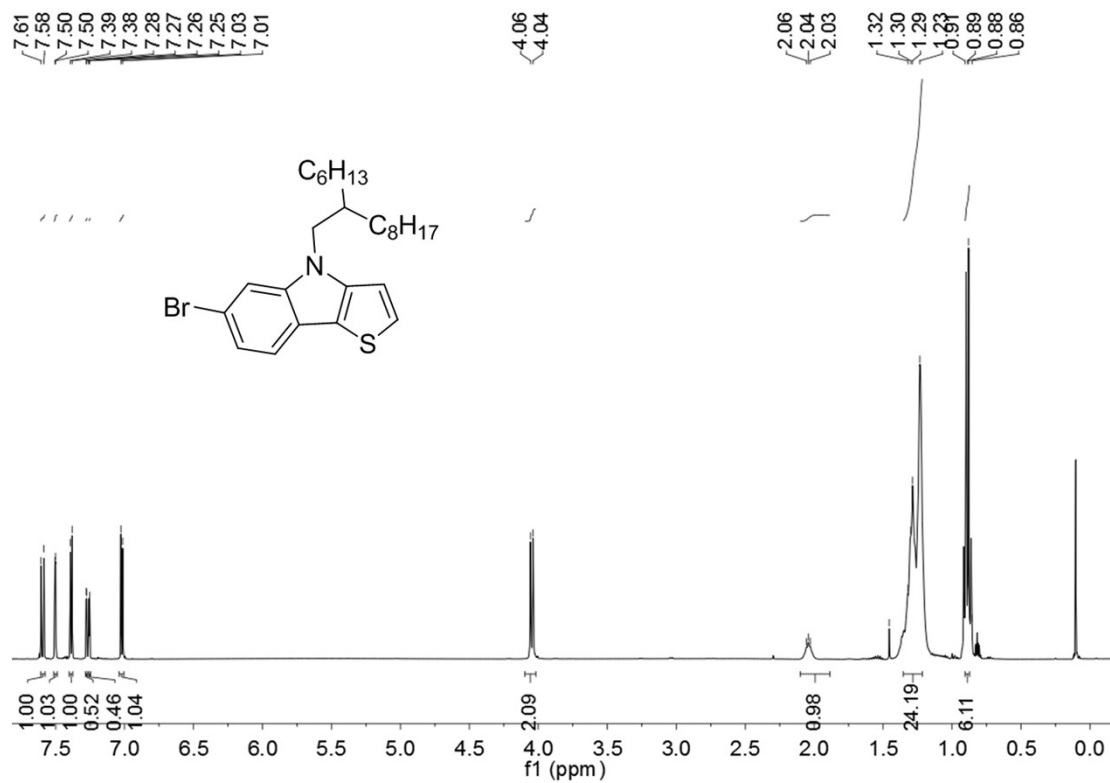

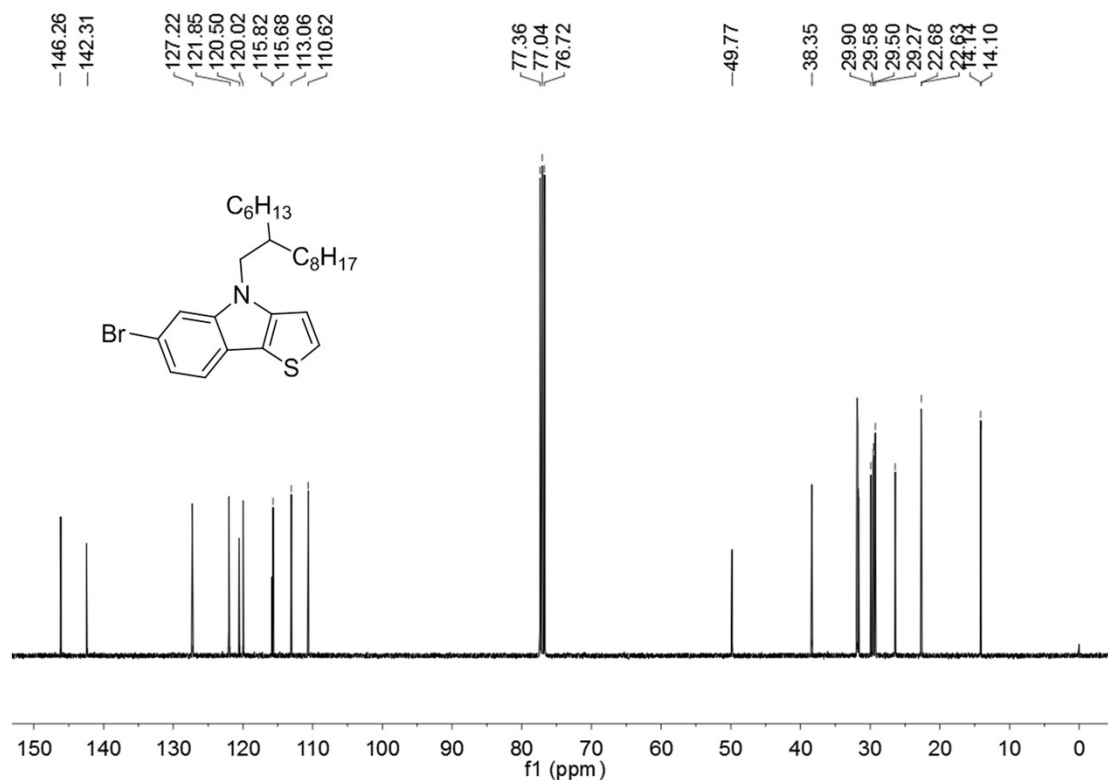

**Fig S8.**  $^1\text{H}$  and  $^{13}\text{C}$  NMR spectra of 6-bromo-4-(2-hexyldecyl)-4H-thieno[3,2-b]indole (4) in  $\text{CDCl}_3$

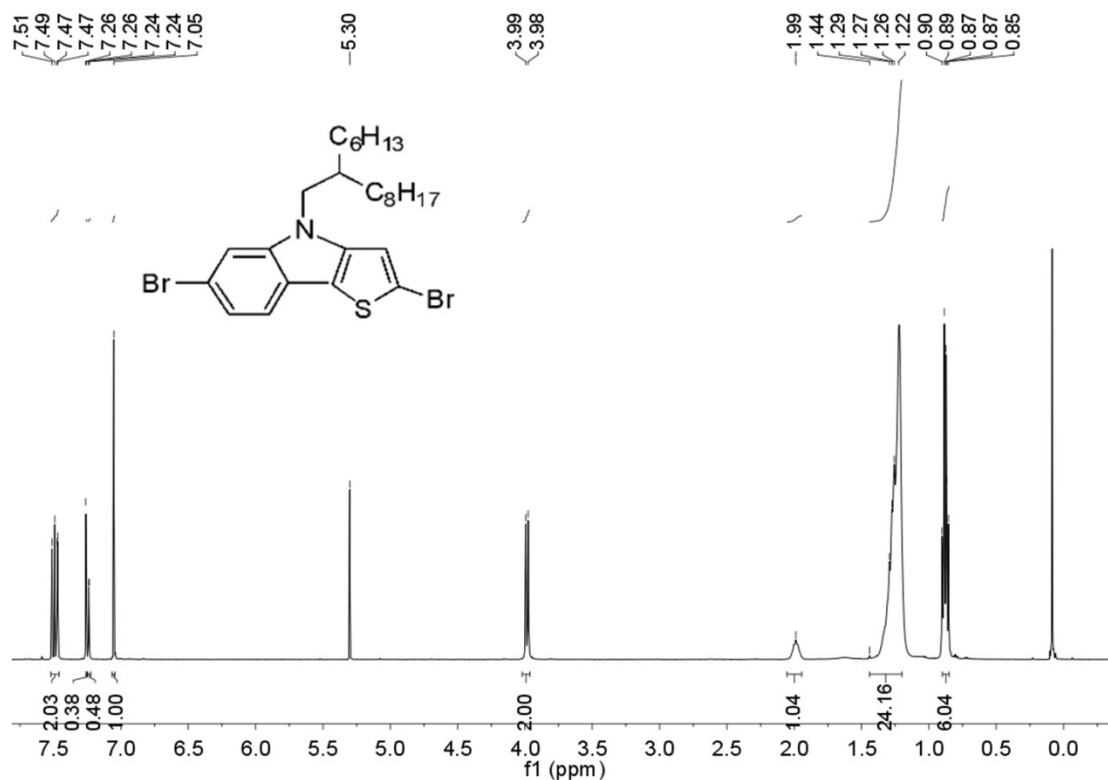



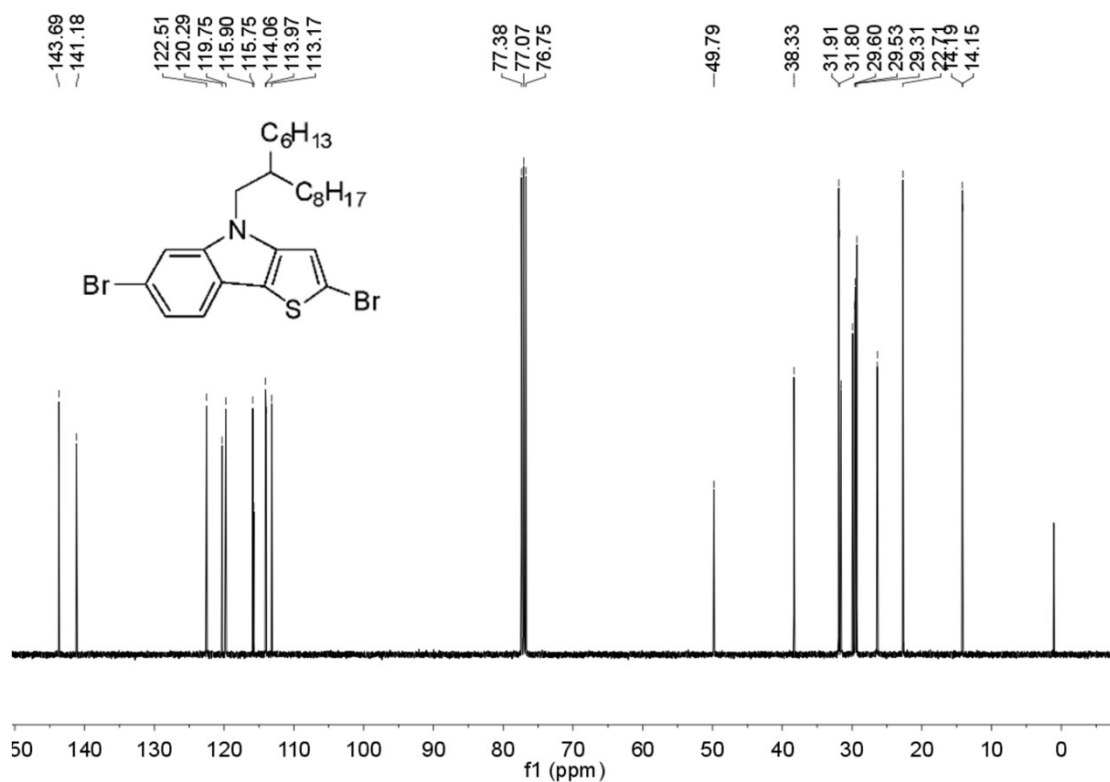

**Fig S9.** <sup>1</sup>H and <sup>13</sup>C NMR spectra of 2,6-dibromo-4-(2-hexyldecyl)-4H-thieno[3,2-b]indole (5) in CDCl<sub>3</sub>.

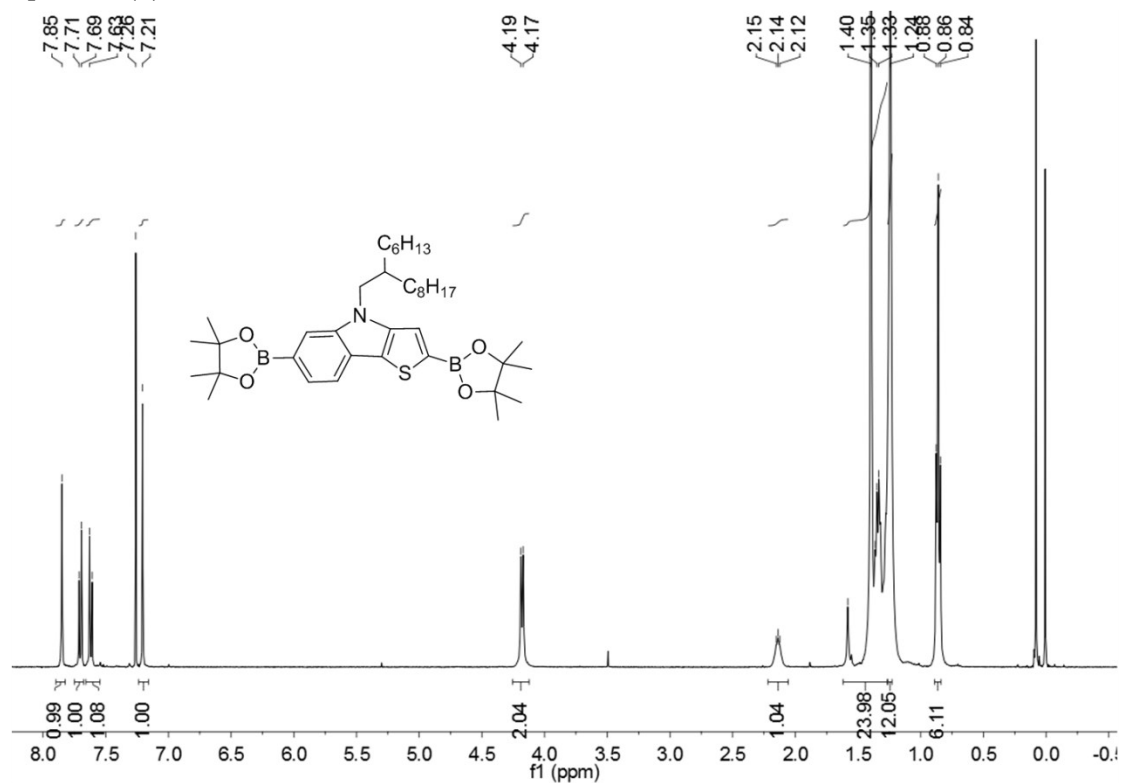

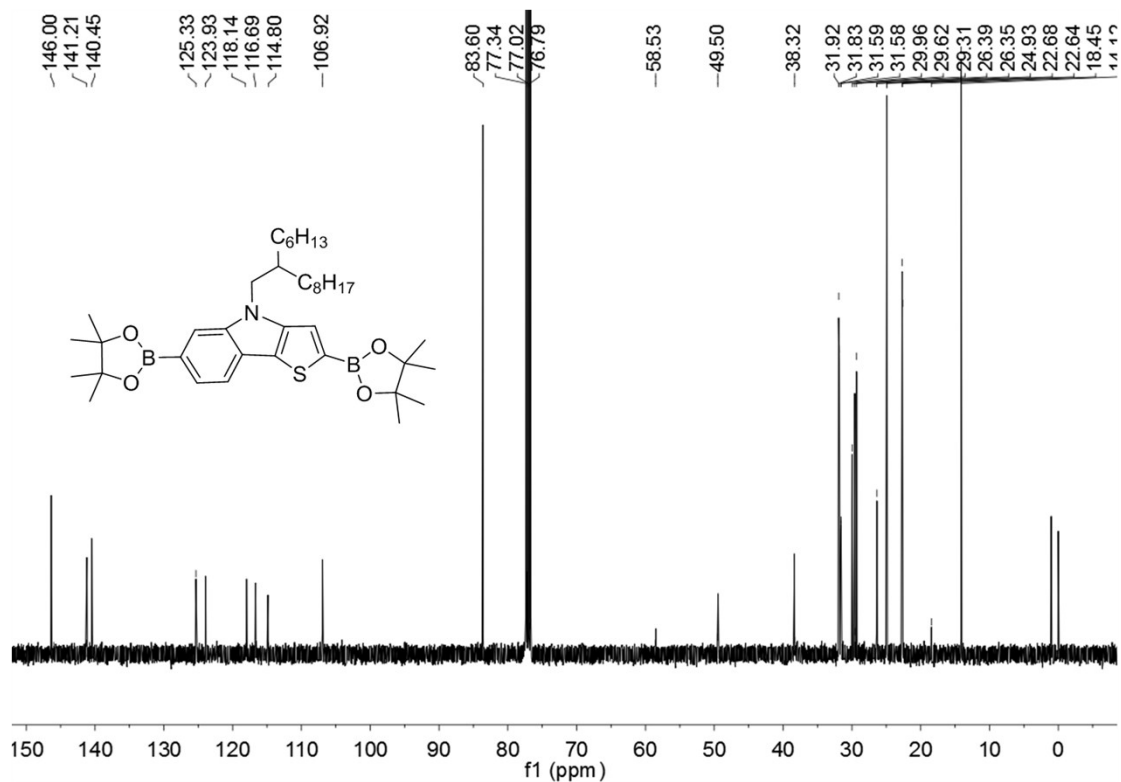

**Fig S10.** <sup>1</sup>H and <sup>13</sup>C NMR spectra of 4-(2-hexyldecyl)-2,6-bis(4,4,5,5-tetramethyl-1,3,2-dioxaborolan-2-yl)-4H-thieno[3,2-b]indole (M1) in CDCl<sub>3</sub>

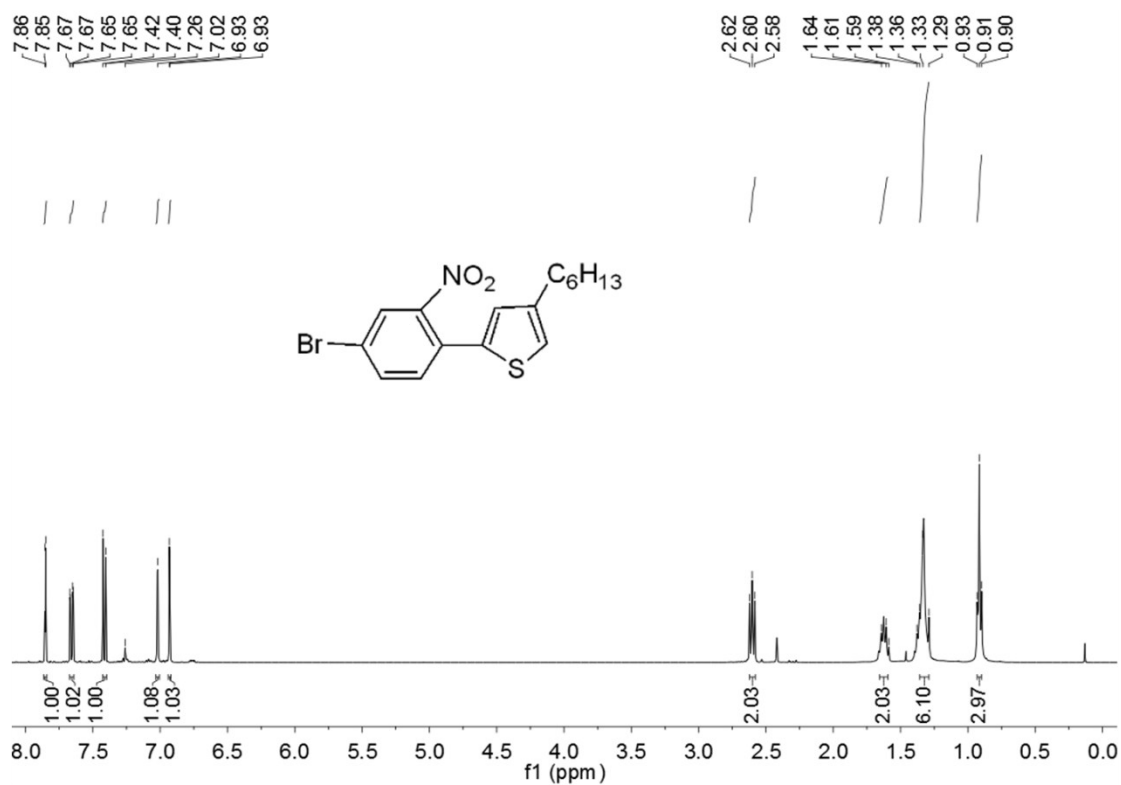

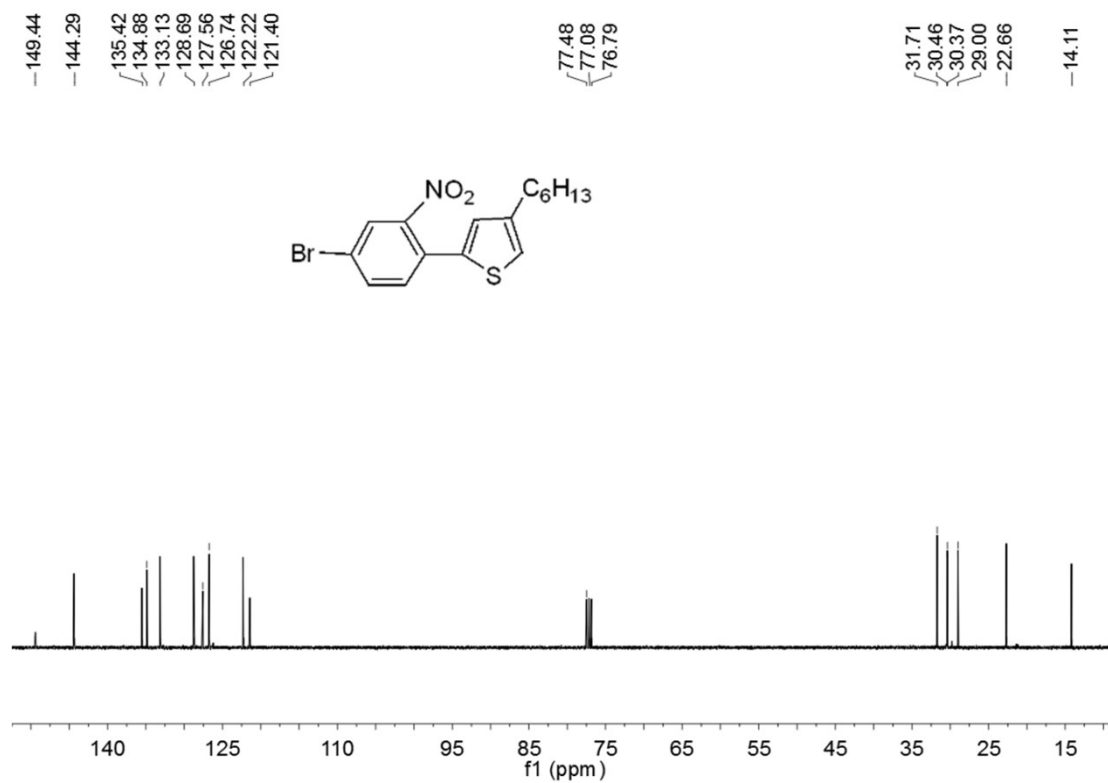

**Fig S11.** <sup>1</sup>H and <sup>13</sup>C NMR spectra of 2-(4-bromo-2-nitrophenyl)-4-hexylthiophene (6) in CDCl<sub>3</sub>

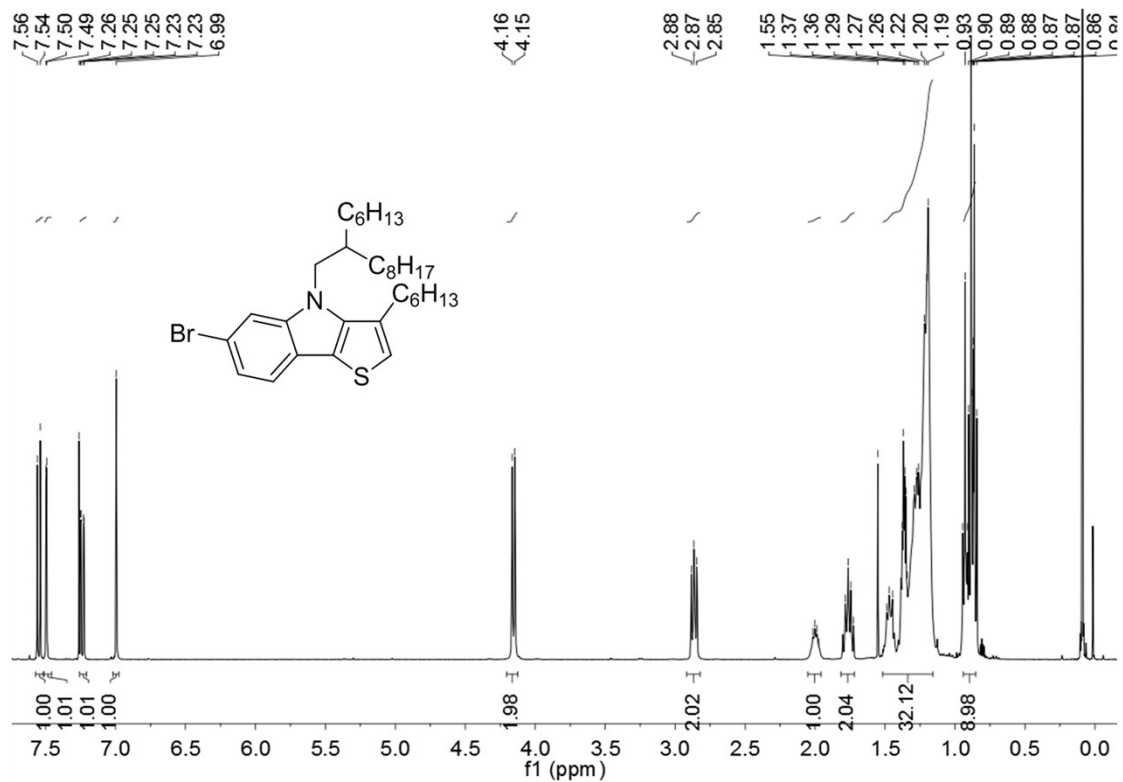

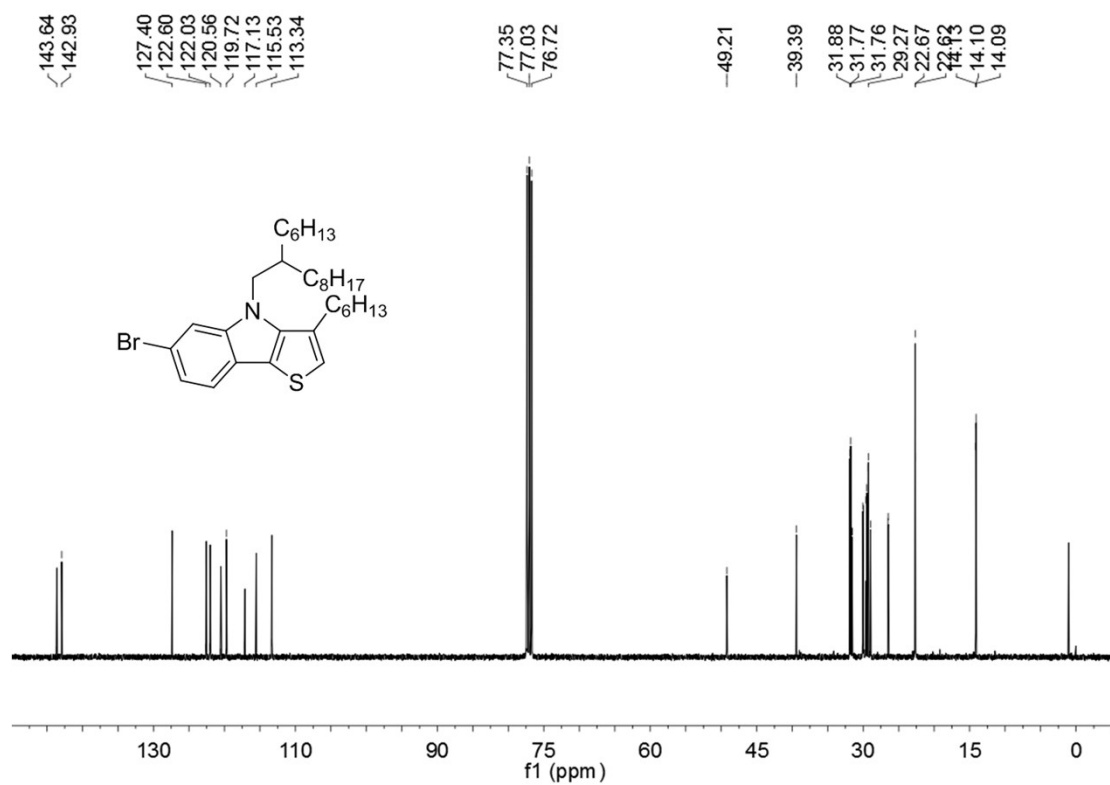

**Fig S12.** <sup>1</sup>H and <sup>13</sup>C NMR spectra of 6-bromo-3-hexyl-4-(2-hexyldecyl)-4H-thieno[3,2-b]indole (8) in CDCl<sub>3</sub>

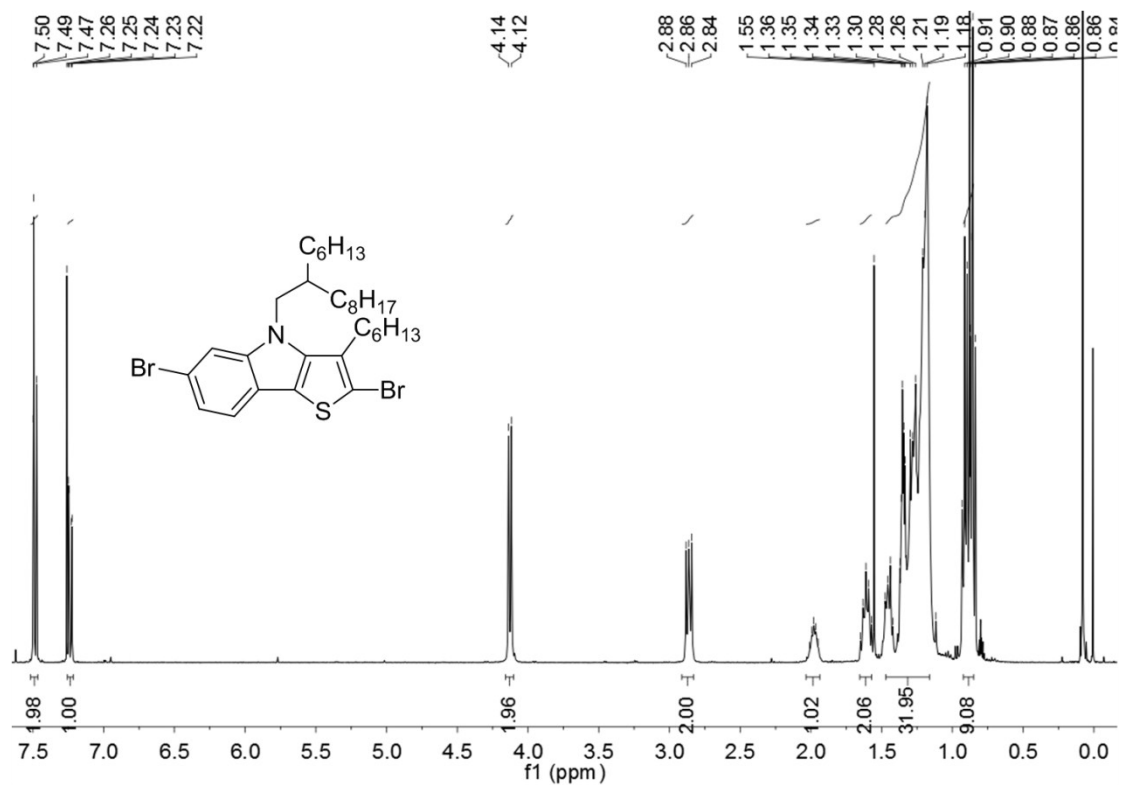

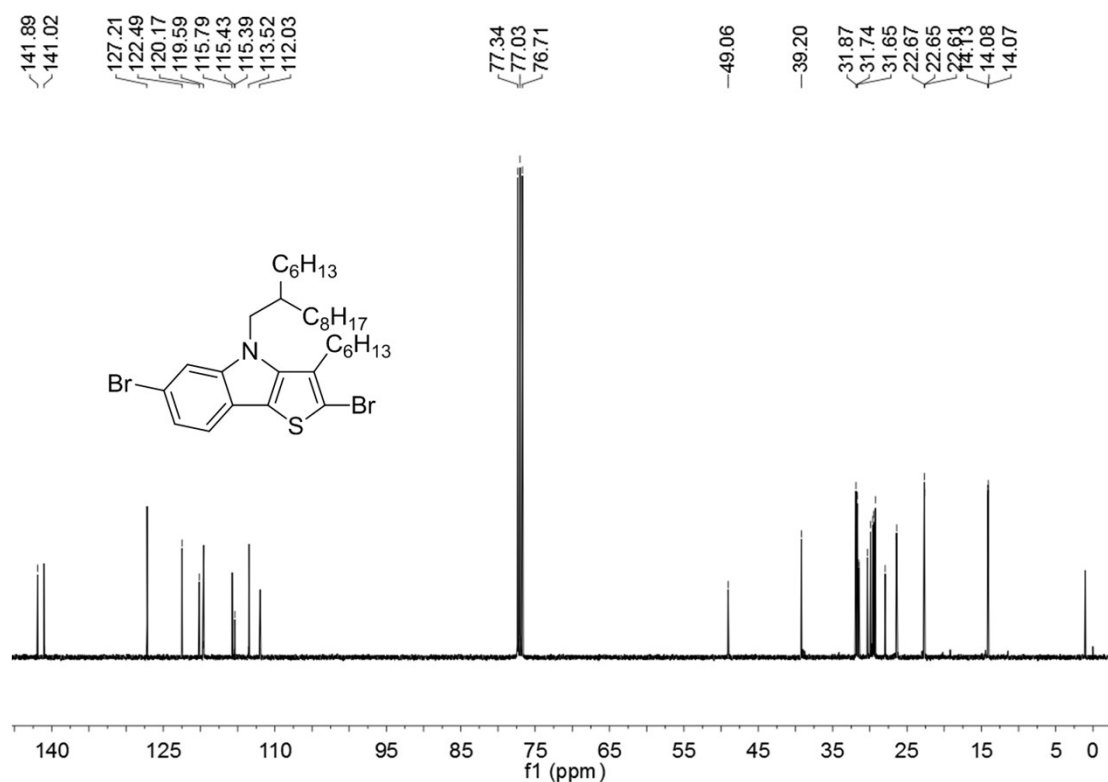

**Fig S13.** <sup>1</sup>H and <sup>13</sup>C NMR spectra of 2,6-dibromo-3-hexyl-4-(2-hexyldecyl)-4H-thieno[3,2-b]indole (M2) in CDCl<sub>3</sub>

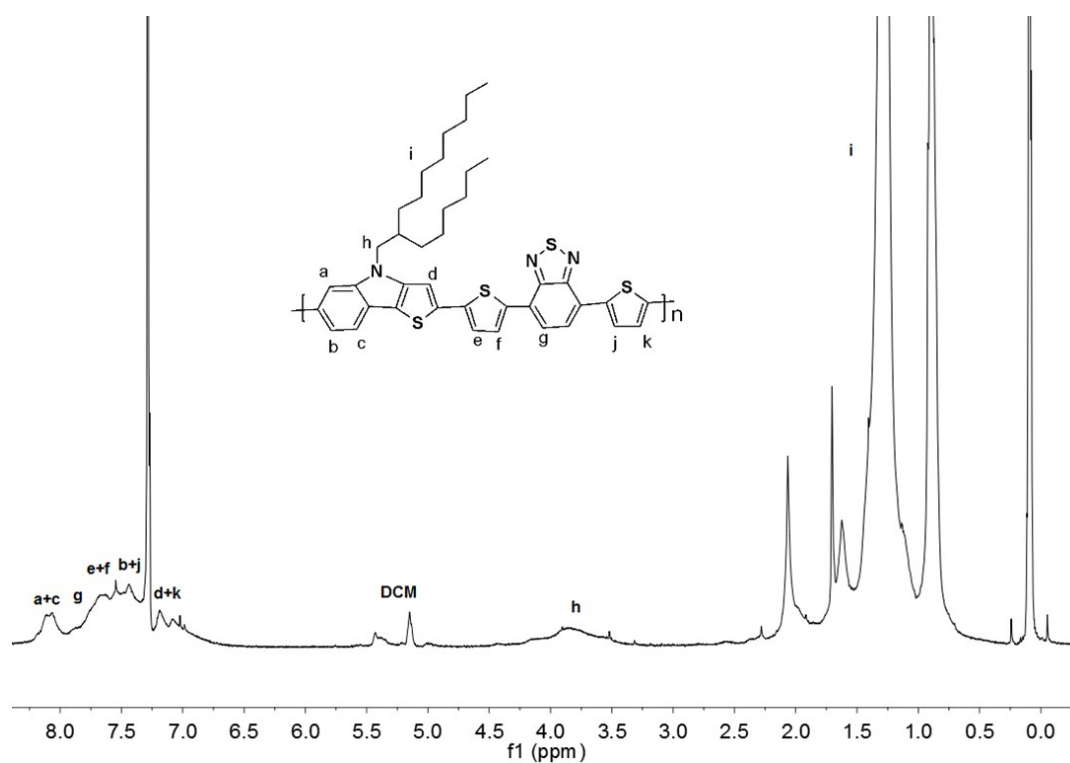

**Fig S14.** <sup>1</sup>H NMR spectra of the copolymer P1 in CDCl<sub>3</sub>

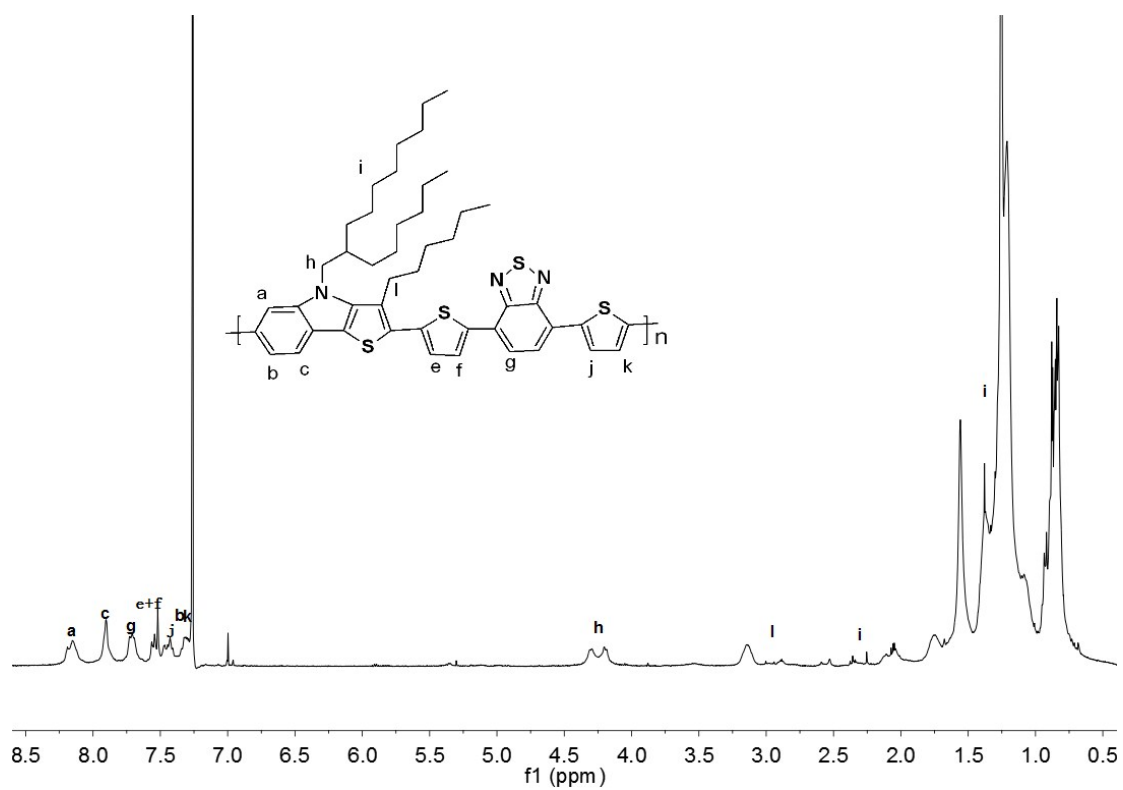

**Fig S15.**  $^1\text{H}$  NMR spectra of the copolymer P2 in  $\text{CDCl}_3$

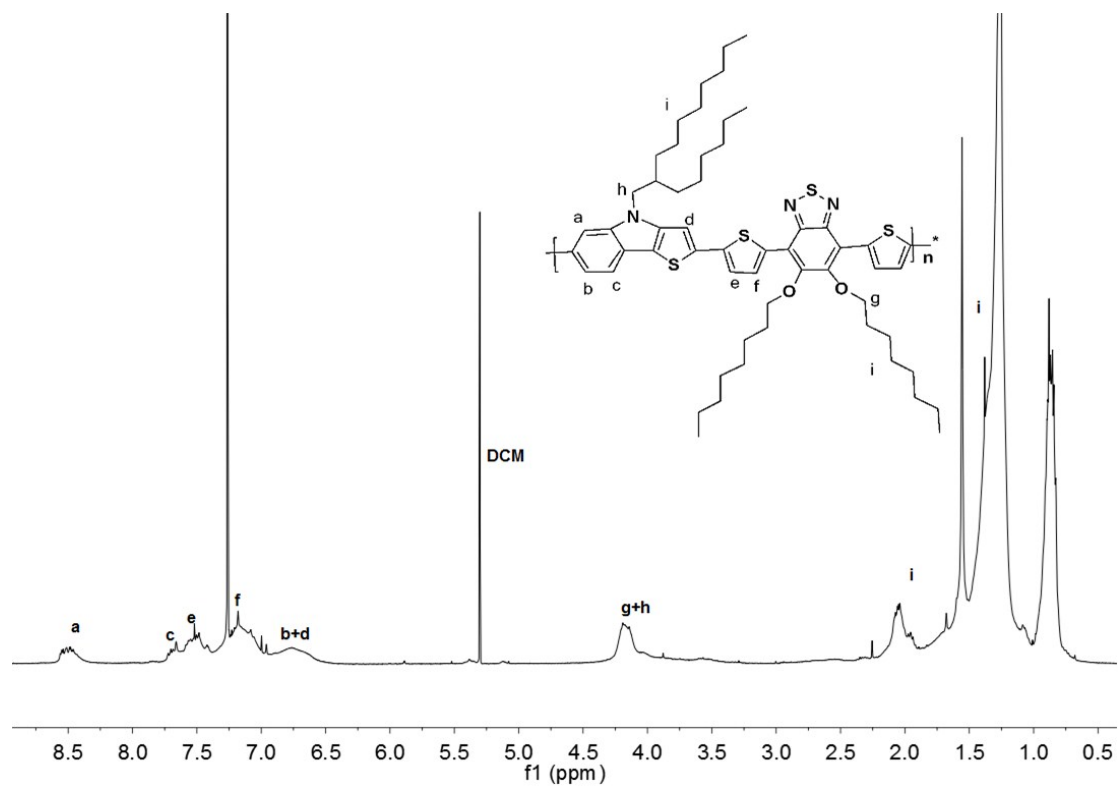

**Fig S16.**  $^1\text{H}$  NMR spectra of the copolymer P3 in  $\text{CDCl}_3$
